# Supplementary material
Source: ML conference proceedings conference paper supplement (https://openreview.net/forum?id=6KlIzfkTfi)
Supplement: supplementary_material [file Appendix.pdf › Appendix.pdf]

|    |                                                                                |           |
|----|--------------------------------------------------------------------------------|-----------|
| 1  | <b>Contents</b>                                                                |           |
| 2  | <b>A More Discussion on Related Works.</b>                                     | <b>2</b>  |
| 3  | <b>B Topological Properties of 0-order Pure Edges</b>                          | <b>2</b>  |
| 4  | <b>C Verification of Purity Law on CVRP</b>                                    | <b>3</b>  |
| 5  | <b>D Detailed Description of Statistical Dataset</b>                           | <b>4</b>  |
| 6  | <b>E Detailed Fitting Result of Purity Law</b>                                 | <b>4</b>  |
| 7  | <b>F Connection between Purity Law and k-Nearest Prior</b>                     | <b>5</b>  |
| 8  | <b>G Proof of the supermodularity of Purity Availability <math>\phi</math></b> | <b>5</b>  |
| 9  | <b>H The Whole PUPO Algorithm</b>                                              | <b>6</b>  |
| 10 | <b>I Further Discussion on Derivation Process and Explanation of PUPO</b>      | <b>7</b>  |
| 11 | <b>J Numerical Result on Two Classical Solvers</b>                             | <b>8</b>  |
| 12 | <b>K Detailed Description of Dataset in Comparative Experiments</b>            | <b>10</b> |
| 13 | <b>L Detailed Description of the Learning Rates</b>                            | <b>10</b> |
| 14 | <b>M Detailed Experimental Result</b>                                          | <b>10</b> |

## 15 A More Discussion on Related Works.

16 With the rapid progress in deep learning, various neural approaches to combinatorial optimization  
17 have emerged. Overviews of these methods can be found in Guo et al. [13] and Bengio et al. [4].

18 **Classical Neural Solvers.** According to the way the solutions are generated, neural approaches can  
19 generally be divided into two classes: learning to directly construct and learning to iteratively improve  
20 solutions. For constructive methods, Vinyals et al. [40] introduce the Pointer Network, which solves  
21 routing problems end-to-end utilizing Recurrent Neural Networks to encode vertex embeddings,  
22 trained via supervised learning. Kool et al. [23] first introduce the Transformer architecture [38]  
23 to solve routing problems. Kwon et al. [25] further propose the policy optimization with multiple  
24 optima (POMO), which improves the performance by exploiting solution symmetries. Meanwhile,  
25 some works based on graph learning [20, 19] also show potential to solve routing problems. Pointer-  
26 former [17] enhances memory efficiency by adopting a reversible residual network in the encoder  
27 and a multi-pointer network in the decoder. For iterative methods, DRL-2opt [6] trains a DRL policy  
28 to select appropriate 2-opt operators for refining solutions. Ma et al. [30] design dual-aspect collabora-  
29 tive Transformer to learn embeddings for the node and positional features separately, iteratively  
30 solving routing problems. GCN+MCTS [10] integrates graph decomposition and Monte Carlo Tree  
31 Search to handle large-scale instances effectively but time-consuming.

32 Next, we will supplement more related work on improving generalization of neural routing problem  
33 solvers. AMDKD [5] introduces knowledge distillation to tackle the cross-distribution generalization  
34 concerns in the routing problem. Specifically, it leverages knowledge from teachers trained on  
35 exemplar distributions to yield a generalist student model. Also along with knowledge distillation,  
36 PDAM [43] adopts curriculum learning to train TSP samples in increasing order of their problem  
37 size and progressively distilling high-level knowledge from small models to large models via a  
38 distillation loss. SCA [22] designs a plugged network to mix scale information into the original  
39 representation vector, which can help the pre-trained model adapt the policy to larger-scale tasks. By  
40 studying adversarial robustness, Geisler [12] derives perturbation models for SAT and TSP to enhance  
41 the expressiveness of the model with perturbations. Zhou [44] proposes a generic meta-learning  
42 framework to enhance the ability of the initialized model to fast adapt to new tasks during inference  
43 and conduct extensive experiments on VRPs. Sahil [31] Formalizes solving a CO problem over a  
44 given instance distribution as a separate learning task and investigates meta-learning to optimize  
45 the capacity of the model to adapt to new tasks. Reformulating the Markov Decision Process of  
46 the solution construction in combinatorial optimization problems, BQ-NCO [7] propose a novel  
47 Bisimulation Quotienting method for generalizable neural solver.

## 48 B Topological Properties of 0-order Pure Edges

49 As the class of edges with the lowest degree of redundancy, 0-order pure edges are demonstrated by  
50 the following propositions to possess a series of favorable topological properties.

51 **Proposition B.1.** *Given an instance  $\mathcal{X}$ , for any vertex  $x \in \mathcal{X}$ , there exists at least one vertex that*  
52 *can form a 0-order pure edge with  $x$ .*

53 *Proof.* We prove the proposition by contradiction.

Assume that for any  $x \in \mathcal{X}$ , we choose

$$y(x) := \arg \min \|x - y\|^2.$$

Since no vertex can form a 0-order pure edge with  $x$ , we have that

$$K_p(x, y(x)) > 0, \quad \forall x \in \mathcal{X}.$$

Therefore, there must exist a point  $z(x)$  such that

$$(x - z(x))^T (y(x) - z(x)) < 0.$$

54 Then we can derive that

$$\begin{aligned}
& \|x - y(x)\|^2 \\
&= \|x - z(x) + z(x) - y(x)\|^2 \\
&= \|x - z(x)\|^2 + \|z(x) - y(x)\|^2 - 2(x - z(x))^T(y(x) - z(x)) \\
&\geq \|x - z(x)\|^2 + \|z(x) - y(x)\|^2 \\
&\geq \|x - z(x)\|^2,
\end{aligned}$$

55 which means that the distance between  $z(x)$  and  $x$  is smaller than the distance between  $y(x)$  and  $x$ .  
56 Therefore, it contradicts the assumption that  $y(x)$  is the nearest neighbor of  $x$ .  $\square$

57 **Proposition B.2.** *Given an instance  $\mathcal{X}$ , the subgraph  $G_0 = (\mathcal{X}, \mathcal{E}_0)$  is connected, where  $\mathcal{E}_0$  is the*  
58 *edge set of all 0-order pure edges.*

59 *Proof.* We prove the proposition by contradiction.

Suppose the subgraph  $G_0$  is not connected. Without loss of generality, assume that  $G_0$  has two connected components, denoted as  $F_1$  and  $F_2$ . Let  $f_1 \in F_1$  and  $f_2 \in F_2$  be such that

$$\text{dist}(f_1, f_2) = \text{dist}(F_1, F_2) = \min_{a \in F_1} \min_{b \in F_2} \text{dist}(a, b).$$

Since  $e_{f_1 f_2} \notin G_0$ , we have that

$$K_p(f_1, f_2) > 0.$$

Therefore, there must exist a point  $f_3$  such that the following inequality holds:

$$(f_1 - f_3)^T(f_2 - f_3) < 0,$$

60 which means that the distance between  $f_3$  and  $f_1$  is smaller than the distance between  $f_2$  and  $f_1$ .  
61 Regardless of whether  $f_3 \in F_1$  or  $f_3 \in F_2$ , this leads to a contradiction with the assumption that the  
62 distance between  $f_1$  and  $f_2$  is the shortest distance between  $F_1$  and  $F_2$ .  $\square$

64 **Proposition B.3.** *Given an instance  $\mathcal{X}$ , for any vertex  $x \in \mathcal{X}$ , the polyhedron formed by its 0-order*  
65 *pure neighbors  $D_0^x$  is convex.*

*Proof.* Consider any three adjacent 0-order pure neighbors  $A, B$ , and  $C$  of point  $X$ . We have that

$$\angle ABC = \angle ABX + \angle XBC.$$

Since  $A$  and  $C$  are 0-order pure neighbors of  $X$ , it follows that

$$\angle ABX, \angle XBC < \frac{\pi}{2},$$

66 and thus  $\angle ABC < \pi$ .

67 Due to the arbitrariness of  $A, B$ , and  $C$ , the polyhedron formed by its 0-order pure neighbors  $D_0^x$  is  
68 convex.  $\square$

69 Proposition B.1 establishes the existence of 0-order pure neighbors for any point, providing a  
70 foundation for subsequent analysis. While proposition B.2 demonstrates that the subgraph formed by  
71 0-order pure edges possesses overall graph structural properties. And proposition B.3 describes the  
72 intrinsic topological features of the 0-order neighbor set for any given point. The three propositions  
73 above characterize the mathematical properties of purity order theoretically.

## 74 C Verification of Purity Law on CVRP

75 Although different routing problems face distinct constraints, the common goal of VRPs is to  
76 minimize the sum of the total tour cost, which is typically characterized by the spatial relationships  
77 between nodes. The Purity Law describes a universal local structure of spatial relationships, which  
78 are highly relevant to the common goal of VRPs. We also verify the Purity Law on CVRP. Using  
79 the dataset from the original paper of INVIT [9], we computed the proportion (%) of edges with  
80 purity orders  $0 \sim 10$  in the optima. The result is shown in the table1. It can be observed that the  
81 negative exponential law still obviously holds. And lowest-order pure edges still keep dominance in  
82 the optimal solutions, while the concentration is slightly reduced due to capacity constraints.

Table 1: The verification result of Purity Law on CVRP.

| Purity Order | CVRP-50 |           |           |           | CVRP-500 |           |           |           |
|--------------|---------|-----------|-----------|-----------|----------|-----------|-----------|-----------|
|              | Uniform | Clustered | Explosion | Implosion | Uniform  | Clustered | Explosion | Implosion |
| 0            | 78.3    | 76.5      | 78.2      | 78.4      | 66.6     | 65.8      | 67.3      | 66.8      |
| 1            | 13.2    | 12.9      | 13.3      | 13.2      | 11.3     | 11.2      | 11.2      | 11.3      |
| 2            | 5.5     | 5.6       | 5.5       | 5.3       | 4.3      | 4.4       | 4.3       | 4.4       |
| 3            | 3.1     | 3.1       | 3.0       | 3.1       | 2.4      | 2.5       | 2.3       | 2.4       |
| 4            | 2.1     | 2.2       | 2.0       | 2.1       | 1.6      | 1.6       | 1.5       | 1.6       |
| 5            | 1.5     | 1.6       | 1.6       | 1.5       | 1.1      | 1.2       | 1.1       | 1.1       |
| 6            | 1.2     | 1.3       | 1.3       | 1.2       | 0.9      | 1.0       | 0.9       | 0.9       |
| 7            | 1.0     | 1.0       | 1.0       | 1.0       | 0.7      | 0.7       | 0.7       | 0.7       |
| 8            | 0.9     | 0.9       | 0.8       | 0.9       | 0.7      | 0.7       | 0.6       | 0.6       |
| 9            | 0.7     | 0.7       | 0.7       | 0.8       | 0.5      | 0.6       | 0.5       | 0.6       |
| 10           | 0.7     | 0.6       | 0.6       | 0.6       | 0.5      | 0.5       | 0.5       | 0.5       |

Table 2: Fitting results of the exponential function.

|          | FITTING ERROR | $\alpha$ | $\beta$  |
|----------|---------------|----------|----------|
| MEAN     | 2.23E-05      | 0.92     | 2.63     |
| VARIANCE | 8.45E-10      | 1.57E-04 | 1.49E-02 |

## 83 D Detailed Description of Statistical Dataset

84 To construct the dataset in statistical experiments, we first generate 21 different scales within the range  
85 of 20 to 1000, with intervals of 50 except 20. For each scale, we consider four widely recognized  
86 classical distributions, which is uniform, cluster, explosion and implosion, resulting in 84 different  
87 instance types totally. For instance types with scales under 500, 256 instances are randomly sampled  
88 to form the dataset, while for those with sizes of 500 or above, the number of instances is reduced  
89 to 128, which is due to the fact that optimal solutions of large-scale instances require an excessive  
90 amount of time. The optimal solutions for all instances are solved by LKH-3 [15, 16], which is the  
91 SOTA heuristic capable of producing optimal solutions even for large-scale instances.

## 92 E Detailed Fitting Result of Purity Law

93 The mean and variance of fitted parameters  $\alpha$  and  $\beta$ , along with fitting errors are shown in Table  
94 2. And the detailed values of the fitting error,  $\alpha$  and  $\beta$  for each instance type are listed in Table 3.  
95 According to the table, the low mean and variance of the fitting errors demonstrate the reliability and  
96 universality of the fitting results across different instance scales and distributions.

Table 3: The fitting errors, coefficients  $\alpha$  and  $\beta$ .

|      | Fitting Error |           |           |           | $\alpha$ |           |           |           | $\beta$ |           |           |           |
|------|---------------|-----------|-----------|-----------|----------|-----------|-----------|-----------|---------|-----------|-----------|-----------|
|      | Uniform       | Clustered | Explosion | Implosion | Uniform  | Clustered | Explosion | Implosion | Uniform | Clustered | Explosion | Implosion |
| 20   | 6.58E-05      | 2.45E-04  | 1.01E-04  | 5.71E-05  | 0.8860   | 0.8554    | 0.8835    | 0.8872    | 2.2514  | 2.0800    | 2.2483    | 2.2630    |
| 50   | 5.42E-05      | 7.90E-05  | 3.96E-05  | 5.05E-05  | 0.9115   | 0.8919    | 0.9027    | 0.9002    | 2.5166  | 2.3295    | 2.4152    | 2.3923    |
| 100  | 2.41E-05      | 3.75E-05  | 1.85E-05  | 3.61E-05  | 0.9204   | 0.9124    | 0.9091    | 0.9137    | 2.5974  | 2.5133    | 2.4567    | 2.5286    |
| 150  | 2.54E-05      | 2.57E-05  | 2.96E-05  | 1.78E-05  | 0.9236   | 0.9188    | 0.9150    | 0.9184    | 2.6410  | 2.5782    | 2.5412    | 2.5681    |
| 200  | 2.18E-05      | 2.20E-05  | 2.62E-05  | 1.63E-05  | 0.9236   | 0.9221    | 0.9197    | 0.9202    | 2.6384  | 2.6192    | 2.6002    | 2.5887    |
| 250  | 1.18E-05      | 1.35E-05  | 2.38E-05  | 2.42E-05  | 0.9263   | 0.9245    | 0.9209    | 0.9227    | 2.6568  | 2.6366    | 2.6066    | 2.6337    |
| 300  | 1.26E-05      | 1.49E-05  | 2.06E-05  | 2.08E-05  | 0.9259   | 0.9258    | 0.9211    | 0.9224    | 2.6535  | 2.6578    | 2.6057    | 2.6201    |
| 350  | 1.39E-05      | 1.40E-05  | 1.61E-05  | 1.71E-05  | 0.9273   | 0.9263    | 0.9236    | 0.9224    | 2.6762  | 2.6621    | 2.6318    | 2.6166    |
| 400  | 1.33E-05      | 1.54E-05  | 1.80E-05  | 1.05E-05  | 0.9278   | 0.9280    | 0.9241    | 0.9235    | 2.6814  | 2.6918    | 2.6430    | 2.6206    |
| 450  | 1.04E-05      | 1.12E-05  | 1.61E-05  | 1.52E-05  | 0.9280   | 0.9288    | 0.9234    | 0.9260    | 2.6805  | 2.6947    | 2.6289    | 2.6633    |
| 500  | 8.38E-06      | 1.15E-05  | 1.18E-05  | 1.28E-05  | 0.9273   | 0.9288    | 0.9256    | 0.9255    | 2.6634  | 2.6936    | 2.6515    | 2.6536    |
| 550  | 1.04E-05      | 1.49E-05  | 1.94E-05  | 1.31E-05  | 0.9306   | 0.9298    | 0.9257    | 0.9267    | 2.7190  | 2.7186    | 2.6615    | 2.6673    |
| 600  | 7.55E-06      | 1.08E-05  | 1.48E-05  | 1.26E-05  | 0.9294   | 0.9306    | 0.9259    | 0.9275    | 2.6931  | 2.7207    | 2.6591    | 2.6803    |
| 650  | 1.13E-05      | 1.37E-05  | 9.63E-06  | 1.79E-05  | 0.9297   | 0.9310    | 0.9262    | 0.9263    | 2.7058  | 2.7293    | 2.6535    | 2.6689    |
| 700  | 1.34E-05      | 1.02E-05  | 1.40E-05  | 1.77E-05  | 0.9280   | 0.9306    | 0.9277    | 0.9256    | 2.6856  | 2.7175    | 2.6877    | 2.6563    |
| 750  | 1.22E-05      | 1.19E-05  | 1.50E-05  | 1.26E-05  | 0.9287   | 0.9308    | 0.9264    | 0.9282    | 2.6959  | 2.7251    | 2.6658    | 2.6930    |
| 800  | 1.22E-05      | 1.29E-05  | 9.97E-06  | 1.19E-05  | 0.9294   | 0.9311    | 0.9255    | 0.9273    | 2.7040  | 2.7323    | 2.6459    | 2.6750    |
| 850  | 1.30E-05      | 1.12E-05  | 1.80E-05  | 1.33E-05  | 0.9300   | 0.9305    | 0.9276    | 0.9271    | 2.7151  | 2.7184    | 2.6909    | 2.6707    |
| 900  | 1.33E-05      | 1.03E-05  | 1.08E-05  | 1.46E-05  | 0.9309   | 0.9316    | 0.9276    | 0.9281    | 2.7296  | 2.7357    | 2.6790    | 2.6906    |
| 950  | 1.33E-05      | 1.38E-05  | 1.44E-05  | 1.41E-05  | 0.9299   | 0.9314    | 0.9284    | 0.9277    | 2.7132  | 2.7376    | 2.6951    | 2.6855    |
| 1000 | 1.51E-05      | 1.21E-05  | 1.26E-05  | 1.24E-05  | 0.9310   | 0.9318    | 0.9282    | 0.9289    | 2.7340  | 2.7413    | 2.6890    | 2.6978    |

## 97 F Connection between Purity Law and k-Nearest Prior

98 The k-nearest prior in routing problems refers to the observation that in optimal solutions, the next  
 99 city visited is frequently among the  $k$  nearest neighbors of the current city, where  $k$  typically a small  
 100 value. Purity Law and the k-nearest prior are both local phenomena that are commonly observed  
 101 in optimal solutions of routing problems. However, the Purity Law can reflect more topological  
 102 information.

103 First, the k-nearest neighbor with smaller values of that exhibit good structural quality tend to  
 104 have lower purity orders for the edges they form. Second, the purity order reflects local structural  
 105 information that the k-nearest prior can not capture. For example, in Fig. 1, both  $x_1$  and  $x_2$  are  
 106 the 5-NN of  $z$ , and they are equivalent under the k-NN metric. However, under the purity order  
 107 metric, they are distinguished. The neighbor  $x_1$  with a lower purity order is a more ideal candidate  
 108 for connecting to  $z$  compared to  $x_2$ , due to its more coherent local structure. Thus, Purity Law  
 109 not only contains distance information but also incorporates the structural information of the node  
 110 distribution around the edges. This richer information carried by Purity Law allows it to contribute  
 111 more effectively to generalization.

## 112 G Proof of the supermodularity of Purity Availability $\phi$

113 **Proposition G.1.** *The set function  $\phi : 2^X \rightarrow \mathbb{R}$  defined on the subsets of the finite set  $X$  is*  
 114 *supermodular, that is, for any subset  $A \subseteq B \subseteq X$  and any  $x \in X \setminus B$ , the following inequality*  
 115 *holds:*

$$\phi(A \cup \{x\}) - \phi(A) \leq \phi(B \cup \{x\}) - \phi(B).$$

116 *Proof.* Given subsets  $U \subseteq X$  and any  $v_1, v_2 \in X \setminus U$ , we prove the equivalent definition of  
 117 supermodular functions:

$$\phi(U \cup \{v_1\}) + \phi(U \cup \{v_2\}) \leq \phi(U \cup \{v_1, v_2\}) + \phi(U). \quad (1)$$

118 First, we have

$$\begin{aligned} \phi(U) &= \frac{\sum_{x_i \in U} \min_{\substack{x_j \in U \\ j \neq i}} K_p(x_i, x_j)}{|U|}. \\ \phi(U \cup \{v_1\}) &= \frac{\sum_{x_i \in U} \min_{\substack{x_j \in U \cup \{v_1\} \\ j \neq i}} K_p(x_i, x_j) + \min_{x_j \in U} K_p(v_1, x_j)}{|U| + 1} \\ \phi(U \cup \{v_2\}) &= \frac{\sum_{x_i \in U} \min_{\substack{x_j \in U \cup \{v_2\} \\ j \neq i}} K_p(x_i, x_j) + \min_{x_j \in U} K_p(v_2, x_j)}{|U| + 1} \\ \phi(U \cup \{v_1, v_2\}) &= \frac{\sum_{x_i \in U} \min_{\substack{x_j \in U \cup \{v_1, v_2\} \\ j \neq i}} K_p(x_i, x_j) + \min_{x_j \in U \cup \{v_2\}} K_p(v_1, x_j) + \min_{x_j \in U \cup \{v_1\}} K_p(v_2, x_j)}{|U| + 2}. \end{aligned}$$

119 By the following relations, we partition  $U$  into three parts, denoted as  $U_0, U_1, U_2$ , respectively.

$$U_0 = \{x_i \mid \arg \min_y K_p(x_i, y) \in U\}$$

$$U_1 = \{x_i \mid \arg \min_y K_p(x_i, y) = v_1\}$$

$$U_2 = \{x_i \mid \arg \min_y K_p(x_i, y) = v_2\}$$

120 Then, we prove that the following expression is non-positive from three parts:

$$(\phi(U \cup \{v_1\}) + \phi(U \cup \{v_2\})) - (\phi(U \cup \{v_1, v_2\}) + \phi(U)).$$

121 **Part 1**

$$\begin{aligned} & \sum_{x_i \in U_0} \min_{x_j \in U} K_p(x_i, x_j) \left[ \frac{2}{|U|+1} - \left( \frac{1}{|U|} + \frac{1}{|U|+2} \right) \right] \\ & \leq \sum_{x_i \in U_0} \min_{x_j \in U} K_p(x_i, x_j) \left( \frac{-1}{|U|(|U|+1)(|U|+2)} \right) \leq 0 \end{aligned}$$

122 **Part 2**

$$\begin{aligned} & \sum_{x_i \in U_1} \left( \left( \frac{\min_{x_j \in U} K_p(x_i, x_j)}{|U|+1} - \frac{\min_{x_j \in U} K_p(x_i, x_j)}{|U|} \right) + \left( \frac{K_p(x_i, v_1)}{|U|+1} - \frac{K_p(x_i, v_1)}{|U|+2} \right) \right) \\ & + \left( \frac{\min_{x_j \in U} K_p(x_j, v_1)}{|U|+1} - \frac{\min_{x_j \in U \cup \{v_2\}} K_p(x_j, v_1)}{|U|+2} \right) \\ & = \sum_{x_i \in U_1} \left( -\frac{\min_{x_j \in U} K_p(x_i, x_j)}{|U|(|U|+1)} + \frac{K_p(x_i, v_1)}{(|U|+1)(|U|+2)} \right) + \frac{\min_{x_j \in U} K_p(x_j, v_1)}{(|U|+1)(|U|+2)} \\ & \leq \sum_{x_i \in U_1} \left( -\frac{K_p(x_i, v_1) + 1}{|U|(|U|+1)} + \frac{K_p(x_i, v_1)}{(|U|+1)(|U|+2)} \right) + \frac{\min_{x_j \in U} K_p(x_j, v_1)}{(|U|+1)(|U|+2)} \\ & = \frac{1}{|U|(|U|+1)(|U|+2)} \left( -2 \sum_{x_j \in U_1} K_p(x_i, v_1) + |U| \min_{x_j \in U} K_p(x_j, v_1) - |U_1|(|U|+2) \right) \\ & \leq \frac{1}{|U|(|U|+1)(|U|+2)} \left( -2|U_1| \min_{x_j \in U} K_p(x_j, v_1) + |U| \min_{x_j \in U} K_p(x_j, v_1) - |U_1|(|U|+2) \right) \\ & \leq \frac{1}{|U|(|U|+1)(|U|+2)} (-2|U_1|^2 - 2|U_1|) \leq 0 \end{aligned}$$

123 **Part 3**

$$\begin{aligned} & \sum_{x_i \in U_2} \left( \left( \frac{\min_{x_j \in U} K_p(x_i, x_j)}{|U|+1} - \frac{\min_{x_j \in U} K_p(x_i, x_j)}{|U|} \right) + \left( \frac{K_p(x_i, v_2)}{|U|+1} - \frac{K_p(x_i, v_2)}{|U|+2} \right) \right) \\ & + \left( \frac{\min_{x_j \in U} K_p(x_j, v_2)}{|U|+1} - \frac{\min_{x_j \in U \cup \{v_1\}} K_p(x_j, v_2)}{|U|+2} \right) \\ & = \sum_{x_i \in U_2} \left( -\frac{\min_{x_j \in U} K_p(x_i, x_j)}{|U|(|U|+1)} + \frac{K_p(x_i, v_2)}{(|U|+1)(|U|+2)} \right) + \frac{\min_{x_j \in U} K_p(x_j, v_2)}{(|U|+1)(|U|+2)} \\ & \leq \sum_{x_i \in U_2} \left( -\frac{K_p(x_i, v_2) + 1}{|U|(|U|+1)} + \frac{K_p(x_i, v_2)}{(|U|+1)(|U|+2)} \right) + \frac{\min_{x_j \in U} K_p(x_j, v_2)}{(|U|+1)(|U|+2)} \\ & = \frac{1}{|U|(|U|+1)(|U|+2)} \left( -2 \sum_{x_j \in U_2} K_p(x_i, v_2) + |U| \min_{x_j \in U} K_p(x_j, v_2) - |U_2|(|U|+2) \right) \\ & \leq \frac{1}{|U|(|U|+1)(|U|+2)} \left( -2|U_2| \min_{x_j \in U} K_p(x_j, v_2) + |U| \min_{x_j \in U} K_p(x_j, v_2) - |U_2|(|U|+2) \right) \\ & \leq \frac{1}{|U|(|U|+1)(|U|+2)} (-2|U_2|^2 - 2|U_2|) \leq 0 \end{aligned}$$

124 The gain consists of three parts, each of which is non-positive. Therefore, the overall gain is  
125 non-positive, and the supermodular property is thus proven.

126

□

## 127 H The Whole PUPO Algorithm

128 The whole algorithm of PUPO is presented in Algorithm 1. PUPO is established upon the REIN-  
129 FORCE with baseline, incorporating Purity Law information into the modified policy gradient. At

---

**Algorithm 1** PUPO Training

---

**Input:** number of epochs  $E$ , steps per epoch  $M$ , batch size  $B$ , scale of training instances  $N$ , discount factor  $\gamma$ , learning rate  $\delta$   
Init  $\theta, \theta^{BL} \leftarrow \theta$   
**for** epoch = 1, ...,  $E$  **do**  
  **for** step = 1, ...,  $M$  **do**  
     $\forall i \in \{1, 2, \dots, B\}$   
     $s_i \leftarrow \text{RandomInstance}()$   
     $\tau^i \leftarrow \text{SampleRollout}(s_i, p_\theta)$   
     $\tau^{i,BL} \leftarrow \text{GreedyRollout}(s_i, p_{\theta^{BL}})$   
     $U_0^i \leftarrow s_i$   
    **for** time = 1, ...,  $N - 1$  **do**  
       $U_t^i \leftarrow U_{t-1}^i \setminus \tau_t^i$   
       $\phi(U_t^i) \leftarrow \sum_{a \in U_t^i} \min_{\substack{b \in U_t^i \\ b \neq a}} K_p(a, b, s_i)$   
       $C(U_t^i, \tau_{t+1}^i) \leftarrow K_p(\tau_t^i, \tau_{t+1}^i, s_i) + \frac{\phi(U_{t+1}^i)}{|U_{t+1}^i|} - \frac{\phi(U_t^i)}{|U_t^i|}$   
       $W_{t+1}^i \leftarrow 1 + \sum_{j=t}^N \gamma^{j-t} C(U_j^i, \tau_{j+1}^i)$   
    **end for**  
     $\nabla \hat{\mathcal{L}} \leftarrow \frac{1}{B} \sum_{i=1}^B (L(\tau^i) - L(\tau^{i,BL})) \cdot \left( \sum_{t=2}^N W_t^i \nabla_\theta \log p_\theta(\tau_t^i | \tau_{1:t-1}^i, s_i) \right)$   
     $\theta \leftarrow \theta + \delta \nabla \hat{\mathcal{L}}$   
  **end for**  
   $\theta^{BL} \leftarrow \text{UpdateBaseline}(\theta, \theta^{BL})$   
**end for**

---

different stages of solution construction, PUPO introduces discounted cost information that reflects the purity potential of the partial solution and the unvisited vertex set, which encourages the model to take actions with lower purity orders at each step during the training process. This approach helps the model to learn consistent patterns with the Purity Law prior, an information that is independent of specific instances, thereby enhancing its generalization ability. Notably, PUPO can be easily integrated with arbitrary existing constructive neural solvers, without any alterations to network architecture.

## I Further Discussion on Derivation Process and Explanation of PUPO

In this section, We will discuss the derivation process and explanation of PUPO in more detail. For convenience,  $W_{t+1}$  denotes the shorthand for  $W(\mathcal{U}_t, \tau_{t+1})$ .

**Enhancing the purity potential of the unvisited vertex set at each step is essential for learning a policy with strong generalization capability.** For intuitive understanding, we plot a specific example shown in Fig. 1. In this figure, policy (a) selects myopic local optima in the earlier decision stages. In the later stages, constrained by the requirement to select vertices only from the unvisited vertex set, it is forced to connect some "bad" edges with higher purity orders (see red edges). In contrast, strategy (b) constructs a tour with a higher overall purity level. For solving instances of the same type during training, the tour lengths obtained by strategies (a) and (b) may not differ significantly. However, when generalized to other instances, myopic strategies like (a), which result in poor purity in the later stages, are more likely to lead to tours of lower quality.

**Inspired by supermodularity, we design purity weights to assess the potential purity of states at each time step for future decision under different policies.** We constructed a Purity Availability metric with supermodular properties to measure the purity potential of the unvisited vertex set. On one hand, since Purity Availability represents the average minimum available purity order, higher values indicate that the state will not be able to generate highly pure structures in the future. For example, in the figure above, the Purity Availability of strategies (a) and (b) at the current state

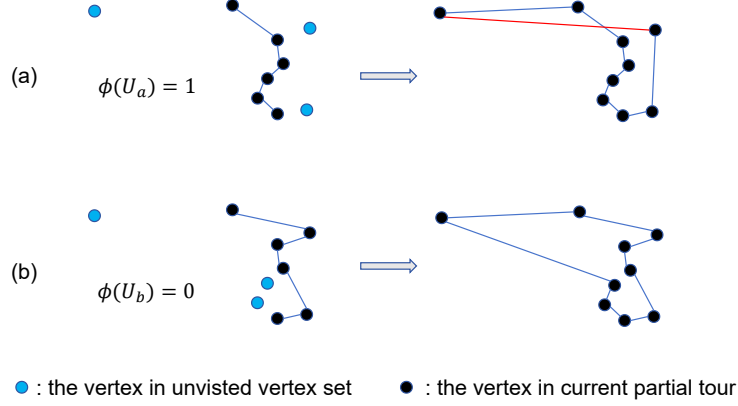

Figure 1: Example of two purity potential.

are 1 and 0, respectively. It means that policy (b) possess ability to construct purer structures in the future. On the other hand, constrained by the necessity to select nodes only from the unvisited vertex set, later decision stages often lead to states that are unfavorable for generalization and difficult to distinguish under tour length metrics. Due to supermodularity, the marginal benefit of Purity Availability,  $\phi(\mathcal{U}_t) - \phi(\mathcal{U}_{t-1})$ , is greater at later stages, making the purity measure in the later decision phases more significant. Inspired by supermodularity, we designed the purity cost based on the marginal benefit of state and the purity order of the actions. Furthermore, we designed purity weights based on the concept of future discounting to comprehensively assess the future purity potential of intermediate states during policy transitions.

**Through analysis of upper and lower bounds and experimental analysis, PUPO encourages the exploration of higher-quality states under the purity measure.** First, we present a pair of upper and lower bounds for Eq. (12). Since  $W_t \geq 1$ , the following inequality holds:

$$\begin{aligned}
 & E_{p_\theta(\tau|\mathcal{X})} \left[ L(\tau) \sum_{t=2}^N \nabla \log p_\theta(\tau_t | \tau_{1:t-1}, \mathcal{X}) \right] \\
 & \leq E_{p_\theta(\tau|\mathcal{X})} \left[ L(\tau) \sum_{t=2}^N W_t \nabla \log p_\theta(\tau_t | \tau_{1:t-1}, \mathcal{X}) \right] \\
 & \leq E_{p_\theta(\tau|\mathcal{X})} \left[ L(\tau) \left( \sum_{t=2}^N W_t \right) \sum_{t=2}^N \nabla \log p_\theta(\tau_t | \tau_{1:t-1}, \mathcal{X}) \right].
 \end{aligned}$$

The left-hand side of the inequality represents the original policy gradient with tour length as the reward, while the right-hand side represents the policy gradient with  $\left( \sum_{t=2}^N W_t \right) L(\tau)$  as the reward.

In this reward, the purity weights act as multiplicative factors on the tour length. It means that the overall purity of the tour is also incorporated into the reward information. The policy gradient of PUPO lies between the two, applying each  $W_t$  to the logarithm of action probabilities at each time step. This more subtle approach encourages the exploration of strategies that can transition to states with higher quality under the purity measure.

## J Numerical Result on Two Classical Solvers

We also conduct experiments on two classical neural solvers POMO and PF. Table 4 show the results on random dataset of TSP. It can be observed that PUPO training enhances the performance of four classical models across nearly all instance types. In particular, AM-100 and PF-100 demonstrate superior performance across all distributions and scales compared to those trained with the vanilla. Table 5 also shows the results on TSPLIB, and Table 6 shows the result on random dataset of CVRP.



180 It can be observed that for CVRP, PUPO training enhances the performance more significantly.  
181 Although PUPO also enhanced the generalizability of AM and PF, their global perception and  
182 decision modules remain vulnerable, resulting in larger performance gaps as the scale increases. This  
183 observation abstracts us to focus on developing network architectures that incorporate Purity Law in  
184 future work.

Table 4: The experimental results of average gap (%) on the randomly generated dataset with different distributions and scales of TSP after training two classical model using both the vanilla and PUPO methods, where bold formatting represents superior results.

| Instances | POMO-50     |              | POMO-100 |              | PF-50       |               | PF-100  |               |
|-----------|-------------|--------------|----------|--------------|-------------|---------------|---------|---------------|
|           | Vanilla     | PUPO         | Vanilla  | PUPO         | Vanilla     | PUPO          | Vanilla | PUPO          |
| U-100     | <b>5.21</b> | 5.35         | 5.07     | <b>4.61</b>  | <b>4.16</b> | 4.31          | 3.64    | <b>3.39</b>   |
| U-1000    | 35.51       | <b>34.01</b> | 31.23    | <b>30.16</b> | 41.00       | <b>39.10</b>  | 30.57   | <b>29.93</b>  |
| U-5000    | 67.99       | <b>65.12</b> | 80.64    | <b>68.42</b> | 113.55      | <b>104.09</b> | 80.59   | <b>77.53</b>  |
| C-100     | <b>7.75</b> | 8.03         | 7.66     | <b>6.07</b>  | <b>7.67</b> | 7.71          | 7.24    | <b>6.90</b>   |
| C-1000    | 41.14       | <b>39.82</b> | 37.99    | <b>33.84</b> | 51.04       | <b>49.58</b>  | 47.50   | <b>44.11</b>  |
| C-5000    | 77.78       | <b>75.93</b> | 76.37    | <b>70.03</b> | 137.51      | <b>131.61</b> | 137.15  | <b>121.79</b> |
| E-100     | <b>5.01</b> | 5.18         | 5.04     | <b>4.71</b>  | <b>4.98</b> | 5.12          | 4.74    | <b>4.65</b>   |
| E-1000    | 35.57       | <b>35.07</b> | 32.97    | <b>30.20</b> | 46.04       | <b>45.34</b>  | 41.60   | <b>37.73</b>  |
| E-5000    | 71.95       | <b>66.66</b> | 74.55    | <b>66.33</b> | 133.99      | <b>129.02</b> | 120.96  | <b>110.16</b> |
| I-100     | <b>5.02</b> | 5.17         | 5.12     | <b>4.64</b>  | <b>4.71</b> | 4.91          | 4.49    | <b>4.35</b>   |
| I-1000    | 37.38       | <b>37.12</b> | 32.44    | <b>30.94</b> | 46.54       | <b>44.83</b>  | 36.11   | <b>34.47</b>  |
| I-5000    | 78.57       | <b>74.05</b> | 72.87    | <b>66.58</b> | 151.37      | <b>138.71</b> | 120.67  | <b>103.74</b> |

Table 5: Performance of average gap (%) on TSPLIB after training two classical model using both the vanilla and PUPO methods.

|           | POMO-50 |       | POMO-100 |       | PF-50   |       | PF-100  |       |
|-----------|---------|-------|----------|-------|---------|-------|---------|-------|
|           | Vanilla | PUPO  | Vanilla  | PUPO  | Vanilla | PUPO  | Vanilla | PUPO  |
| 1~100     | 5.82    | 5.17  | 4.98     | 4.48  | 7.42    | 8.37  | 7.82    | 7.16  |
| 101~1000  | 17.39   | 16.14 | 14.12    | 12.17 | 25.96   | 24.77 | 23.37   | 22.68 |
| 1001~5000 | 48.41   | 46.48 | 43.33    | 40.46 | 75.57   | 72.58 | 66.05   | 60.86 |

Table 6: The experimental results of average gap (%) on the randomly generated dataset with different distributions and scales of CVRP after training POMO model using both the vanilla and PUPO methods, where bold formatting represents superior results.

| Instance | POMO-50      |               | POMO-100      |               |
|----------|--------------|---------------|---------------|---------------|
|          | Vanilla      | PUPO          | Vanilla       | PUPO          |
| U-50     | <b>4.6</b>   | 5.704         | <b>6.146</b>  | 6.769         |
| U-500    | 16.379       | <b>14.311</b> | 14.843        | <b>13.383</b> |
| U-5000   | 22.846       | <b>16.122</b> | 20.599        | <b>18.067</b> |
| C-50     | <b>5.204</b> | 6.346         | 6.388         | <b>6.384</b>  |
| C-500    | 14.997       | <b>13.21</b>  | 12.837        | <b>12.279</b> |
| C-5000   | 15.803       | <b>11.694</b> | <b>13.172</b> | 13.376        |
| E-50     | <b>4.624</b> | 5.851         | <b>6.042</b>  | 6.704         |
| E-500    | 16.227       | <b>14.622</b> | 14.249        | <b>13.525</b> |
| E-5000   | 22.761       | <b>17.148</b> | 21.638        | <b>17.673</b> |
| I-50     | <b>4.57</b>  | 5.794         | <b>6.117</b>  | 6.911         |
| I-500    | 15.744       | <b>14.239</b> | 14.033        | <b>13.16</b>  |
| I-5000   | 19.703       | <b>14.64</b>  | 16.513        | <b>16.214</b> |

## K Detailed Description of Dataset in Comparative Experiments

To ensure the adequacy of the experiments, we validate the model’s performance on two categories of datasets. The randomly generated dataset used in this paper is the same as that in INVIT [9], which is widely adopted to testify existing DRL approach. For TSP, it contains 16 subsets and corresponding (near-)optimal solutions for TSP, including 4 distributions (uniform, clustered, explosion, and implosion, denoted as U, C, E, I) and 4 scales (100, 1000, 5000 and 10000). For CVRP, it contains 12 subsets and corresponding (near-)optimal solutions for CVRP, including 4 distributions (uniform, clustered, explosion, and implosion, denoted as U, C, E, I) and 3 scales (50, 500 and 5000).

The real-world dataset we used is TSPLIB and CVRPLIB. TSPLIB is a well-known TSP library [36] that contains 100 instances with various nodes distributions and their optimal solutions. These instances come from practical applications with scale ranging from 14 to 85,900. In our experiment, we consider all instances with no more than 10000 nodes. For CVRP, we include all instances in CVRPLIB Set-X [37], containing 100 instances varying in scale from 100 to 1000.

## L Detailed Description of the Learning Rates

Specifically, for TSP, the learning rates are set to 0.0001, 0.00015, 0.0001, 0.00017, 0.0001, 0.00012, 0.00011, 0.00012 for POMO-50, POMO-100, PF-50, PF-100, ELG-50, ELG-100, INVIT-50, and INVIT-100, respectively. For CVRP, the learning rates are set to 0.0001, 0.00006, 0.0001, 0.0001, 0.00005, 0.0001 for POMO-50, POMO-100, ELG-50, ELG-100, INVIT-50, and INVIT-100.

## M Detailed Experimental Result

Table 7 shows the training time per epoch with different methods. We can see that the training time of PUPO does not increase significantly owing to the tensorizable computation.

Table 7: The numerical results of training time (minutes) per epoch during different training.

|         | POMO-50 | POMO-100 | INVIT-50 | INVIT-100 |
|---------|---------|----------|----------|-----------|
| Vanilla | 3.05    | 4.49     | 7.72     | 15.75     |
| PUPO    | 5.95    | 14.20    | 11.598   | 21.40     |

The experimental results of the specific tour length is presented in Table 8. Table 9 illustrates the solving time of Vanilla-trained and PUPO-trained models on randomly generated dataset. Following the table, it can be observed that there is almost no difference between Vanilla and PUPO. The numerical results of purity metrics for all models are presented in Table 10. Following the table, PUPO-trained models possess the ability to generate solutions with more outstanding purity. Detailed results of ELG and INVIT are provided in Table 11 to Table 22.

Table 8: The length of tours generated from each model after different training on randomly generated dataset of TSP.

|           |       | POMO-50 |       | POMO-100 |       | PF-50   |        | PF-100  |       | INVIT-50 |       | INVIT-100 |       |
|-----------|-------|---------|-------|----------|-------|---------|--------|---------|-------|----------|-------|-----------|-------|
|           |       | Vanilla | PUPO  | Vanilla  | PUPO  | Vanilla | PUPO   | Vanilla | PUPO  | Vanilla  | PUPO  | Vanilla   | PUPO  |
| Uniform   | 100   | 8.28    | 8.29  | 8.27     | 8.23  | 8.19    | 8.21   | 8.15    | 8.13  | 8.03     | 8.04  | 8.07      | 8.05  |
|           | 1000  | 31.47   | 31.12 | 30.47    | 30.22 | 32.74   | 32.30  | 30.32   | 30.17 | 24.91    | 24.88 | 24.94     | 24.67 |
|           | 5000  | 85.75   | 84.28 | 92.20    | 85.97 | 109.00  | 104.18 | 92.18   | 90.62 | 55.85    | 55.69 | 55.84     | 55.15 |
|           | 10000 | -       | -     | -        | -     | -       | -      | -       | -     | 79.07    | 78.88 | 78.79     | 77.87 |
| Clustered | 100   | 5.72    | 5.73  | 5.71     | 5.63  | 5.71    | 5.71   | 5.68    | 5.67  | 5.46     | 5.46  | 5.50      | 5.48  |
|           | 1000  | 19.82   | 19.65 | 19.39    | 18.80 | 21.26   | 21.05  | 20.78   | 20.30 | 15.25    | 15.19 | 15.24     | 15.07 |
|           | 5000  | 53.06   | 52.50 | 52.64    | 50.77 | 70.86   | 69.10  | 70.71   | 66.13 | 32.79    | 32.66 | 32.73     | 32.39 |
|           | 10000 | -       | -     | -        | -     | -       | -      | -       | -     | 44.88    | 44.58 | 44.72     | 44.17 |
| Explosion | 100   | 6.86    | 6.87  | 6.86     | 6.83  | 6.86    | 6.87   | 6.84    | 6.83  | 6.67     | 6.66  | 6.70      | 6.68  |
|           | 1000  | 21.90   | 21.84 | 21.47    | 21.03 | 23.50   | 23.36  | 22.72   | 22.10 | 17.67    | 17.60 | 17.67     | 17.53 |
|           | 5000  | 57.30   | 55.81 | 58.14    | 55.62 | 77.35   | 75.30  | 72.57   | 69.02 | 37.52    | 37.28 | 37.23     | 36.88 |
|           | 10000 | -       | -     | -        | -     | -       | -      | -       | -     | 43.28    | 43.05 | 43.18     | 42.66 |
| Implosion | 100   | 7.48    | 7.49  | 7.48     | 7.45  | 7.45    | 7.47   | 7.43    | 7.42  | 7.29     | 7.29  | 7.32      | 7.30  |
|           | 1000  | 27.61   | 27.57 | 26.63    | 26.33 | 29.39   | 29.04  | 27.28   | 26.95 | 21.64    | 21.63 | 21.69     | 21.51 |
|           | 5000  | 72.59   | 71.24 | 71.28    | 68.46 | 100.18  | 95.14  | 86.94   | 80.27 | 44.96    | 44.83 | 45.05     | 44.78 |
|           | 10000 | -       | -     | -        | -     | -       | -      | -       | -     | 72.24    | 71.79 | 72.17     | 71.18 |

Table 9: The solving time for each model with different training methods on randomly generated dataset of TSP.

|         | POMO-50 |       | POMO-100 |       | PF-50   |        | PF-100  |        | INVt-50 |        | INVt-100 |        |
|---------|---------|-------|----------|-------|---------|--------|---------|--------|---------|--------|----------|--------|
|         | Vanilla | PUPU  | Vanilla  | PUPU  | Vanilla | PUPU   | Vanilla | PUPU   | Vanilla | PUPU   | Vanilla  | PUPU   |
| U-100   | 0.20    | 0.22  | 0.21     | 0.22  | 2.02    | 1.97   | 1.00    | 1.02   | 0.85    | 0.80   | 1.07     | 0.91   |
| U-1000  | 2.35    | 2.34  | 2.41     | 2.40  | 23.67   | 24.08  | 13.57   | 14.18  | 13.24   | 12.88  | 17.83    | 17.34  |
| U-5000  | 19.68   | 19.10 | 20.00    | 19.57 | 246.65  | 246.12 | 205.14  | 204.15 | 91.20   | 89.44  | 120.07   | 119.87 |
| U-10000 | -       | -     | -        | -     | -       | -      | -       | -      | 224.99  | 223.69 | 288.44   | 287.11 |
| C-100   | 0.21    | 0.21  | 0.21     | 0.21  | 2.08    | 2.13   | 0.97    | 0.98   | 0.84    | 0.80   | 1.04     | 1.17   |
| C-1000  | 2.35    | 2.35  | 2.44     | 2.43  | 25.28   | 26.11  | 14.05   | 15.28  | 13.00   | 12.77  | 17.57    | 16.56  |
| C-5000  | 19.16   | 19.38 | 19.99    | 19.35 | 275.68  | 274.49 | 212.36  | 211.68 | 89.48   | 88.23  | 118.63   | 117.31 |
| C-10000 | -       | -     | -        | -     | -       | -      | -       | -      | 222.47  | 222.32 | 288.67   | 288.90 |
| E-100   | 0.21    | 0.21  | 0.20     | 0.22  | 2.18    | 2.17   | 0.97    | 1.09   | 0.82    | 0.83   | 1.05     | 0.94   |
| E-1000  | 2.38    | 2.36  | 2.46     | 2.40  | 25.44   | 24.53  | 13.94   | 13.82  | 12.94   | 13.05  | 17.70    | 17.98  |
| E-5000  | 19.30   | 18.67 | 19.98    | 19.57 | 411.08  | 411.22 | 213.01  | 212.39 | 89.58   | 89.93  | 118.93   | 118.34 |
| E-10000 | -       | -     | -        | -     | -       | -      | -       | -      | 223.24  | 223.03 | 288.86   | 288.32 |
| I-100   | 0.21    | 0.20  | 0.21     | 0.21  | 3.02    | 2.89   | 1.00    | 0.97   | 0.83    | 0.79   | 1.05     | 1.01   |
| I-1000  | 2.37    | 2.45  | 2.45     | 2.45  | 20.84   | 21.01  | 14.08   | 13.99  | 12.91   | 12.73  | 17.60    | 17.31  |
| I-5000  | 19.95   | 19.28 | 19.84    | 19.30 | 445.75  | 444.87 | 186.14  | 186.05 | 89.92   | 88.30  | 118.87   | 118.69 |
| I-10000 | -       | -     | -        | -     | -       | -      | -       | -      | 222.56  | 221.72 | 289.39   | 290.99 |

Table 10: The numerical results of purity evaluation for three models on TSP after different training.

|         | POMO-50    |                   |             |            |                |             | POMO-100   |                   |             |            |                |             |
|---------|------------|-------------------|-------------|------------|----------------|-------------|------------|-------------------|-------------|------------|----------------|-------------|
|         | Prop-0 (%) | Vanilla APO (all) | APO (non-0) | Prop-0 (%) | PUPU APO (all) | APO (non-0) | Prop-0 (%) | Vanilla APO (all) | APO (non-0) | Prop-0 (%) | PUPU APO (all) | APO (non-0) |
| U-100   | 75.65%     | 0.15              | 1.11        | 75.29%     | 0.15           | 1.11        | 76.81%     | 0.15              | 1.12        | 79.48%     | 0.14           | 1.17        |
| U-1000  | 62.51%     | 0.64              | 1.98        | 64.32%     | 0.62           | 1.92        | 65.67%     | 0.52              | 1.75        | 67.70%     | 0.52           | 1.76        |
| U-5000  | 24.91%     | 1.36              | 2.97        | 26.39%     | 1.33           | 3.05        | 24.54%     | 1.50              | 3.03        | 26.64%     | 1.23           | 2.74        |
| U-10000 | -          | -                 | -           | -          | -              | -           | -          | -                 | -           | -          | -              | -           |
| C-100   | 70.66%     | 0.23              | 1.26        | 70.13%     | 0.24           | 1.28        | 72.34%     | 0.24              | 1.30        | 75.35%     | 0.20           | 1.28        |
| C-1000  | 59.13%     | 0.85              | 2.30        | 58.29%     | 0.80           | 2.19        | 61.18%     | 0.77              | 2.17        | 62.52%     | 0.66           | 1.97        |
| C-5000  | 23.65%     | 1.93              | 3.88        | 23%        | 1.64           | 3.33        | 23.58%     | 1.64              | 3.31        | 24.76%     | 1.48           | 3.05        |
| C-10000 | -          | -                 | -           | -          | -              | -           | -          | -                 | -           | -          | -              | -           |
| E-100   | 73.72%     | 0.17              | 1.15        | 74.35%     | 0.17           | 1.14        | 75.24%     | 0.17              | 1.17        | 77.77%     | 0.17           | 1.22        |
| E-1000  | 62.92%     | 0.69              | 2.03        | 61.35%     | 0.67           | 2.03        | 63.32%     | 0.62              | 1.89        | 65.58%     | 0.57           | 1.84        |
| E-5000  | 25.09%     | 1.53              | 3.27        | 23.99%     | 1.41           | 3.06        | 24.20%     | 1.55              | 3.13        | 26.04%     | 1.30           | 2.82        |
| E-10000 | -          | -                 | -           | -          | -              | -           | -          | -                 | -           | -          | -              | -           |
| I-100   | 72.97%     | 0.19              | 1.20        | 73.50%     | 0.19           | 1.19        | 74.80%     | 0.19              | 1.23        | 77.27%     | 0.18           | 1.26        |
| I-1000  | 61.52%     | 0.77              | 2.22        | 60.27%     | 0.77           | 2.20        | 64.14%     | 0.65              | 2.01        | 65.01%     | 0.62           | 1.95        |
| I-5000  | 24.05%     | 1.93              | 3.83        | 23.70%     | 1.69           | 3.41        | 24.12%     | 1.65              | 3.33        | 25.30%     | 1.46           | 3.07        |
| I-10000 | -          | -                 | -           | -          | -              | -           | -          | -                 | -           | -          | -              | -           |
|         | PF-50      |                   |             |            |                |             | PF-100     |                   |             |            |                |             |
|         | Prop-0 (%) | Vanilla APO (all) | APO (non-0) | Prop-0 (%) | PUPU APO (all) | APO (non-0) | Prop-0 (%) | Vanilla APO (all) | APO (non-0) | Prop-0 (%) | PUPU APO (all) | APO (non-0) |
| U-100   | 77.46%     | 0.14              | 1.09        | 77.57%     | 0.15           | 1.10        | 80.07%     | 0.12              | 1.08        | 80.31%     | 0.12           | 1.08        |
| U-1000  | 59.68%     | 0.74              | 2.00        | 60.73%     | 0.70           | 1.94        | 65.66%     | 0.56              | 1.78        | 66.06%     | 0.54           | 1.75        |
| U-5000  | 18.66%     | 2.36              | 3.92        | 20.04%     | 2.14           | 3.65        | 23.09%     | 1.56              | 2.94        | 23.60%     | 1.49           | 2.92        |
| U-10000 | -          | -                 | -           | -          | -              | -           | -          | -                 | -           | -          | -              | -           |
| C-100   | 71.41%     | 0.24              | 1.27        | 71.53%     | 0.25           | 1.29        | 72.49%     | 0.24              | 1.29        | 73.64%     | 0.23           | 1.28        |
| C-1000  | 52.39%     | 1.21              | 2.67        | 52.53%     | 1.17           | 2.60        | 54.38%     | 1.09              | 2.54        | 56.51%     | 0.97           | 2.37        |
| C-5000  | 15.08%     | 4.52              | 6.54        | 15.42%     | 4.06           | 5.95        | 16.08%     | 4.20              | 6.31        | 18%        | 3.13           | 4.93        |
| C-10000 | -          | -                 | -           | -          | -              | -           | -          | -                 | -           | -          | -              | -           |
| E-100   | 74.92%     | 0.19              | 1.16        | 74.82%     | 0.18           | 1.17        | 76.63%     | 0.17              | 1.17        | 77.34%     | 0.16           | 1.16        |
| E-1000  | 55.35%     | 0.98              | 2.33        | 55.95%     | 0.98           | 2.34        | 57.53%     | 0.89              | 2.21        | 59.66%     | 0.81           | 2.12        |
| E-5000  | 16.05%     | 3.52              | 5.18        | 16.64%     | 3.39           | 5.10        | 17.60%     | 3.01              | 4.62        | 18.77%     | 2.73           | 4.40        |
| E-10000 | -          | -                 | -           | -          | -              | -           | -          | -                 | -           | -          | -              | -           |
| I-100   | 73.76%     | 0.24              | 1.30        | 73.68%     | 0.24           | 1.28        | 75.67%     | 0.22              | 1.29        | 76.24%     | 0.22           | 1.29        |
| I-1000  | 54.17%     | 1.40              | 3.09        | 55.04%     | 1.42           | 3.15        | 59.29%     | 1.14              | 2.79        | 60.07%     | 1.13           | 2.81        |
| I-5000  | 15.18%     | 8.14              | 10.81       | 15.90%     | 8.46           | 11.59       | 17.79%     | 7.46              | 10.38       | 18.88%     | 6.02           | 8.88        |
| I-10000 | -          | -                 | -           | -          | -              | -           | -          | -                 | -           | -          | -              | -           |
|         | INVt-50    |                   |             |            |                |             | INVt-100   |                   |             |            |                |             |
|         | Prop-0 (%) | Vanilla APO (all) | APO (non-0) | Prop-0 (%) | PUPU APO (all) | APO (non-0) | Prop-0 (%) | Vanilla APO (all) | APO (non-0) | Prop-0 (%) | PUPU APO (all) | APO (non-0) |
| U-100   | 81.52%     | 0.10              | 1.05        | 0.82       | 0.10           | 1.04        | 80.95%     | 0.11              | 1.07        | 0.82       | 0.10           | 1.05        |
| U-1000  | 86%        | 0.16              | 1.37        | 0.86       | 0.15           | 1.33        | 85.80%     | 0.17              | 1.43        | 0.87       | 0.14           | 1.33        |
| U-5000  | 43.52%     | 0.18              | 1.56        | 0.44       | 0.17           | 1.05        | 43.38%     | 0.20              | 1.61        | 0.44       | 0.17           | 1.48        |
| U-10000 | 87.39%     | 0.18              | 1.55        | 0.88       | 0.17           | 1.50        | 87.32%     | 0.20              | 1.65        | 0.88       | 0.16           | 1.47        |
| C-100   | 79.78%     | 0.14              | 1.18        | 0.80       | 0.13           | 1.17        | 79.26%     | 0.16              | 1.26        | 0.80       | 0.14           | 1.19        |
| C-1000  | 86.02%     | 0.22              | 1.88        | 0.86       | 0.19           | 1.63        | 85.56%     | 0.23              | 1.83        | 0.87       | 0.18           | 1.61        |
| C-5000  | 43.72%     | 0.20              | 1.61        | 0.44       | 0.18           | 1.55        | 43.32%     | 0.27              | 2.20        | 0.44       | 0.17           | 1.52        |
| C-10000 | 87.40%     | 0.84              | 6.91        | 0.88       | 0.88           | 7.34        | 87.15%     | 0.71              | 5.74        | 0.88       | 0.87           | 7.77        |
| E-100   | 80.56%     | 0.12              | 1.11        | 0.81       | 0.12           | 1.11        | 80.09%     | 0.13              | 1.15        | 0.81       | 0.12           | 1.11        |
| E-1000  | 85.42%     | 0.30              | 2.34        | 0.86       | 0.28           | 2.23        | 85.09%     | 0.30              | 2.33        | 0.86       | 0.26           | 2.16        |
| E-5000  | 43.54%     | 0.42              | 3.47        | 0.44       | 0.48           | 4.07        | 43.40%     | 0.53              | 4.33        | 0.44       | 0.43           | 3.73        |
| E-10000 | 87%        | 0.95              | 7.68        | 0.87       | 1.03           | 8.38        | 87%        | 0.97              | 7.58        | 0.88       | 0.88           | 7.57        |
| I-100   | 79.98%     | 0.12              | 1.12        | 0.80       | 0.12           | 1.12        | 79.77%     | 0.14              | 1.17        | 0.80       | 0.13           | 1.13        |
| I-1000  | 85.69%     | 0.19              | 1.54        | 0.86       | 0.18           | 1.54        | 85.39%     | 0.21              | 1.64        | 0.86       | 0.18           | 1.55        |
| I-5000  | 43.39%     | 0.23              | 1.88        | 0.44       | 0.22           | 1.81        | 43.33%     | 0.24              | 1.92        | 0.44       | 0.19           | 1.66        |
| I-10000 | 87.34%     | 0.30              | 2.47        | 0.88       | 0.29           | 2.39        | 87.16%     | 0.27              | 2.18        | 0.88       | 0.30           | 2.62        |

Table 11: Detailed results of ELG-TSP-50 [Vanilla] on random dataset.

| Instance | Mean Time (s) | Mean Length | Mean Gap (%) | Min Gap (%) | Max Gap (%) | Std   |
|----------|---------------|-------------|--------------|-------------|-------------|-------|
| U-50     | 0.167         | 8.385       | 6.599        | 1.095       | 13.377      | 0.019 |
| U-500    | 1.638         | 28.051      | 20.805       | 16.915      | 25.198      | 0.017 |
| U-5000   | 21.006        | 67.121      | 31.496       | 30.52       | 32.456      | 0.009 |
| C-50     | 0.17          | 5.838       | 10.047       | 3.552       | 20.179      | 0.03  |
| C-500    | 2.027         | 17.867      | 27.142       | 19.898      | 34.527      | 0.034 |
| C-5000   | 19.721        | 41.468      | 38.888       | 35.129      | 42.994      | 0.03  |
| E-50     | 0.169         | 6.97        | 6.848        | 1.456       | 19.511      | 0.024 |
| E-500    | 2.079         | 20.064      | 24.554       | 17.191      | 32.079      | 0.036 |
| E-5000   | 19.915        | 45.129      | 35.672       | 32.112      | 42.508      | 0.045 |
| I-50     | 0.167         | 7.591       | 6.655        | 1.143       | 14.219      | 0.021 |
| I-500    | 1.96          | 24.401      | 21.303       | 17.254      | 25.035      | 0.02  |
| I-5000   | 19.832        | 53.693      | 30.403       | 28.01       | 32.592      | 0.018 |

Table 12: Detailed results of ELG-TSP-50 [PUPO] on random dataset.

| Instance | Mean Time (s) | Mean Length | Mean Gap (%) | Min Gap (%) | Max Gap (%) | Std   |
|----------|---------------|-------------|--------------|-------------|-------------|-------|
| U-50     | 0.163         | 8.425       | 7.102        | 0.73        | 13.637      | 0.018 |
| U-500    | 1.667         | 27.742      | 19.474       | 15.497      | 22.476      | 0.015 |
| U-5000   | 21.34         | 64.744      | 26.84        | 24.991      | 28.767      | 0.015 |
| C-50     | 0.169         | 5.783       | 8.982        | 2.337       | 17.056      | 0.026 |
| C-500    | 2.012         | 17.461      | 24.132       | 18.047      | 29.298      | 0.024 |
| C-5000   | 19.84         | 40.475      | 35.625       | 34.174      | 38.202      | 0.016 |
| E-50     | 0.171         | 6.996       | 7.234        | 0.849       | 15.83       | 0.022 |
| E-500    | 2.139         | 19.941      | 23.767       | 18.862      | 30.275      | 0.032 |
| E-5000   | 19.73         | 42.989      | 28.882       | 26.586      | 32.44       | 0.022 |
| I-50     | 0.172         | 7.629       | 7.233        | 1.79        | 19.087      | 0.023 |
| I-500    | 2             | 24.238      | 20.544       | 16.96       | 25.203      | 0.019 |
| I-5000   | 19.781        | 52.342      | 27.644       | 25.039      | 30.885      | 0.021 |

Table 13: Detailed results of ELG-TSP-100 [Vanilla] on random dataset.

| Instance | Mean Time (s) | Mean Length | Mean Gap (%) | Min Gap (%) | Max Gap (%) | Std   |
|----------|---------------|-------------|--------------|-------------|-------------|-------|
| U-50     | 0.17          | 8.327       | 5.859        | 1.414       | 10.455      | 0.017 |
| U-500    | 1.714         | 27.389      | 17.954       | 15.157      | 21.448      | 0.016 |
| U-5000   | 21.802        | 65.96       | 29.223       | 27.378      | 30.284      | 0.011 |
| C-50     | 0.18          | 5.912       | 11.495       | 3.5         | 33.416      | 0.041 |
| C-500    | 2.135         | 17.842      | 27.057       | 17.086      | 53.627      | 0.059 |
| C-5000   | 20.303        | 41.904      | 40.44        | 35.008      | 53.044      | 0.073 |
| E-50     | 0.177         | 6.991       | 7.277        | 1.466       | 32.814      | 0.037 |
| E-500    | 2.164         | 19.952      | 24.007       | 15.306      | 34.444      | 0.046 |
| E-5000   | 20.288        | 44.711      | 34.771       | 28.244      | 53.191      | 0.104 |
| I-50     | 0.181         | 7.582       | 6.639        | 1.27        | 53.637      | 0.037 |
| I-500    | 2.129         | 23.869      | 18.621       | 13.569      | 23.293      | 0.021 |
| I-5000   | 20.454        | 53.499      | 30.701       | 28.03       | 37.713      | 0.04  |

Table 14: Detailed results of ELG-TSP-100 [PUPO] on random dataset.

| Instance | Mean Time (s) | Mean Length | Mean Gap (%) | Min Gap (%) | Max Gap (%) | Std   |
|----------|---------------|-------------|--------------|-------------|-------------|-------|
| U-50     | 0.169         | 8.416       | 6.394        | 1.544       | 11.726      | 0.018 |
| U-500    | 1.642         | 27.513      | 18.491       | 15.788      | 21.281      | 0.013 |
| U-5000   | 21.291        | 63.176      | 23.769       | 22.484      | 24.722      | 0.008 |
| C-50     | 0.168         | 5.803       | 9.374        | 3.302       | 19.165      | 0.027 |
| C-500    | 2.028         | 17.033      | 21.131       | 15.879      | 26.933      | 0.022 |
| C-5000   | 19.813        | 38.576      | 29.285       | 27.614      | 30.616      | 0.011 |
| E-50     | 0.17          | 6.993       | 7.188        | 1.913       | 15.156      | 0.022 |
| E-500    | 2.094         | 19.599      | 21.568       | 16.944      | 27.233      | 0.025 |
| E-5000   | 19.835        | 42.083      | 26.262       | 23.14       | 29.791      | 0.025 |
| I-50     | 0.171         | 7.657       | 7.602        | 1.684       | 16.868      | 0.023 |
| I-500    | 1.978         | 24.035      | 19.515       | 14.306      | 23.205      | 0.017 |
| I-5000   | 19.735        | 51.01       | 24.636       | 21.293      | 28.75       | 0.031 |

Table 15: Detailed results of ELG-VRP-50 [Vanilla] on random dataset.

| Instance | Mean Time (s) | Mean Length | Mean Gap (%) | Min Gap (%) | Max Gap (%) | Std   |
|----------|---------------|-------------|--------------|-------------|-------------|-------|
| U-50     | 0.182         | 10.597      | 7.446        | 2.438       | 15.163      | 0.024 |
| U-500    | 1.702         | 79.532      | 15.478       | 10.783      | 20.443      | 0.027 |
| U-5000   | 41.938        | 729.196     | 22.753       | 12.2        | 31.278      | 0.069 |
| C-50     | 0.192         | 9.228       | 7.451        | 1.417       | 19.272      | 0.032 |
| C-500    | 1.788         | 64.274      | 16.468       | 10.468      | 25.644      | 0.035 |
| C-5000   | 31.429        | 681.954     | 20.448       | 14.562      | 29.403      | 0.063 |
| E-50     | 0.189         | 9.461       | 7.577        | 1.767       | 16.394      | 0.026 |
| E-500    | 1.783         | 60.506      | 15.855       | 11.473      | 26.178      | 0.032 |
| E-5000   | 31.684        | 437.246     | 27.103       | 15.508      | 48.303      | 0.126 |
| I-50     | 0.191         | 10.086      | 7.766        | 1.961       | 19.897      | 0.028 |
| I-500    | 1.797         | 73.173      | 15.762       | 10.151      | 22.652      | 0.03  |
| I-5000   | 31.711        | 700.698     | 19.427       | 15.743      | 28.109      | 0.051 |

Table 16: Detailed results of ELG-VRP-50 [PUPO] on random dataset.

| Instance | Mean Time (s) | Mean Length | Mean Gap (%) | Min Gap (%) | Max Gap (%) | Std   |
|----------|---------------|-------------|--------------|-------------|-------------|-------|
| U-50     | 0.186         | 10.665      | 8.15         | 2.483       | 21.006      | 0.027 |
| U-500    | 1.694         | 76.488      | 10.968       | 8.122       | 15.112      | 0.016 |
| U-5000   | 31.128        | 647.568     | 8.312        | 7.469       | 10.66       | 0.013 |
| C-50     | 0.189         | 9.21        | 7.275        | 1.289       | 20.119      | 0.029 |
| C-500    | 1.759         | 60.866      | 10.214       | 6.542       | 15.321      | 0.02  |
| C-5000   | 30.684        | 615.111     | 8.72         | 4.76        | 16.811      | 0.048 |
| E-50     | 0.189         | 9.513       | 8.132        | 2.725       | 17.49       | 0.027 |
| E-500    | 1.748         | 58.13       | 11.117       | 8.009       | 17.598      | 0.02  |
| E-5000   | 30.737        | 373.572     | 8.516        | 6.827       | 11.048      | 0.018 |
| I-50     | 0.187         | 10.127      | 8.22         | 2.307       | 17.804      | 0.028 |
| I-500    | 1.767         | 70.051      | 10.83        | 7.665       | 14.91       | 0.016 |
| I-5000   | 30.623        | 629.346     | 7.046        | 4.803       | 9.885       | 0.021 |

Table 17: Detailed results of ELG-VRP-100 [Vanilla] on random dataset.

| Instance | Mean Time (s) | Mean Length | Mean Gap (%) | Min Gap (%) | Max Gap (%) | Std   |
|----------|---------------|-------------|--------------|-------------|-------------|-------|
| U-50     | 0.195         | 10.685      | 8.315        | 1.049       | 19.544      | 0.028 |
| U-500    | 1.843         | 75.079      | 8.907        | 6.067       | 13.065      | 0.015 |
| U-5000   | 33.265        | 631.606     | 5.969        | 4.003       | 8.587       | 0.018 |
| C-50     | 0.199         | 9.22        | 7.395        | 1.519       | 21.493      | 0.032 |
| C-500    | 1.856         | 60.128      | 8.818        | 4.944       | 13.067      | 0.018 |
| C-5000   | 31.53         | 609.493     | 7.103        | 5.912       | 8.039       | 0.01  |
| E-50     | 0.2           | 9.547       | 8.566        | 2.14        | 23.925      | 0.031 |
| E-500    | 1.865         | 57.156      | 9.322        | 7.064       | 15.291      | 0.019 |
| E-5000   | 31.831        | 372.201     | 8.259        | 6.408       | 9.693       | 0.013 |
| I-50     | 0.201         | 10.144      | 8.344        | 1.643       | 20.51       | 0.031 |
| I-500    | 1.888         | 68.729      | 8.97         | 5.076       | 14.439      | 0.017 |
| I-5000   | 31.839        | 622.795     | 6.013        | 5.351       | 6.99        | 0.007 |

Table 18: Detailed results of ELG-VRP-100 [PUPO] on random dataset.

| Instance | Mean Time (s) | Mean Length | Mean Gap (%) | Min Gap (%) | Max Gap (%) | Std   |
|----------|---------------|-------------|--------------|-------------|-------------|-------|
| U-50     | 0.178         | 10.811      | 9.093        | 2.543       | 22.455      | 0.031 |
| U-500    | 1.673         | 75.034      | 8.842        | 6.207       | 11.874      | 0.015 |
| U-5000   | 31.197        | 626.848     | 5.142        | 3.314       | 7.476       | 0.016 |
| C-50     | 0.189         | 9.359       | 8.047        | 1.617       | 23.159      | 0.038 |
| C-500    | 1.757         | 59.604      | 7.92         | 5.273       | 13.105      | 0.015 |
| C-5000   | 30.857        | 597.049     | 5.434        | 2.846       | 6.627       | 0.016 |
| E-50     | 0.19          | 9.647       | 9.148        | 1.991       | 23.308      | 0.034 |
| E-500    | 1.757         | 56.838      | 8.676        | 6.645       | 12.068      | 0.015 |
| E-5000   | 30.796        | 365.526     | 6.33         | 4.875       | 7.202       | 0.009 |
| I-50     | 0.189         | 10.262      | 8.673        | 1.927       | 23.732      | 0.036 |
| I-500    | 1.758         | 68.808      | 8.833        | 6.697       | 14.897      | 0.014 |
| I-5000   | 30.911        | 617.372     | 5.237        | 3.594       | 6.488       | 0.011 |

Table 19: Detailed results of INVIT-VRP-50 [Vanilla] on random dataset.

| Instance | Mean Time (s) | Mean Length | Mean Gap (%) | Min Gap (%) | Max Gap (%) | Std   |
|----------|---------------|-------------|--------------|-------------|-------------|-------|
| U-50     | 0.836         | 10.286      | 4.251        | 0.544       | 8.944       | 0.016 |
| U-500    | 8.903         | 76.366      | 10.747       | 9.049       | 13.794      | 0.012 |
| U-5000   | 137.071       | 654.376     | 9.672        | 8.218       | 10.969      | 0.01  |
| C-50     | 0.74          | 8.978       | 4.5          | 0.718       | 15.507      | 0.024 |
| C-500    | 8.035         | 60.676      | 9.786        | 7.865       | 11.631      | 0.008 |
| C-5000   | 131.165       | 615.721     | 8.492        | 7.421       | 9.728       | 0.011 |
| E-50     | 0.769         | 9.199       | 4.555        | 0.296       | 11.336      | 0.018 |
| E-500    | 8.044         | 57.801      | 10.475       | 7.92        | 15.046      | 0.015 |
| E-5000   | 131.003       | 376.968     | 9.641        | 8.73        | 10.735      | 0.009 |
| I-50     | 0.743         | 9.775       | 4.408        | 0.427       | 12.283      | 0.019 |
| I-500    | 7.756         | 69.659      | 10.148       | 7.872       | 12.083      | 0.01  |
| I-5000   | 128.097       | 635.588     | 8.229        | 7.275       | 9.21        | 0.008 |

Table 20: Detailed results of INVIT-VRP-50 [PUPO] on random dataset.

| Instance | Mean Time (s) | Mean Length | Mean Gap (%) | Min Gap (%) | Max Gap (%) | Std   |
|----------|---------------|-------------|--------------|-------------|-------------|-------|
| U-50     | 0.797         | 10.329      | 4.584        | 0.572       | 9.606       | 0.016 |
| U-500    | 7.909         | 75.738      | 9.828        | 7.848       | 12.912      | 0.011 |
| U-5000   | 128.458       | 639.748     | 7.256        | 6.153       | 9.235       | 0.012 |
| C-50     | 0.789         | 9.008       | 4.841        | 0.553       | 15.779      | 0.025 |
| C-500    | 7.947         | 60.189      | 8.926        | 7.654       | 11.551      | 0.009 |
| C-5000   | 127.466       | 608.262     | 7.072        | 6.281       | 7.985       | 0.007 |
| E-50     | 0.795         | 9.233       | 4.943        | 0.531       | 10.928      | 0.019 |
| E-500    | 8.012         | 57.44       | 9.819        | 7.607       | 14.179      | 0.014 |
| E-5000   | 132.614       | 370.181     | 7.705        | 6.471       | 9.107       | 0.012 |
| I-50     | 0.846         | 9.819       | 4.872        | 0.481       | 14.009      | 0.02  |
| I-500    | 8.1           | 69.219      | 9.49         | 7.007       | 12.117      | 0.012 |
| I-5000   | 130.251       | 627.491     | 6.873        | 6.444       | 7.233       | 0.003 |

Table 21: Detailed results of INVIT-VRP-100 [Vanilla] on random dataset.

| Instance | Mean Time (s) | Mean Length | Mean Gap (%) | Min Gap (%) | Max Gap (%) | Std   |
|----------|---------------|-------------|--------------|-------------|-------------|-------|
| U-50     | 0.778         | 10.319      | 4.75         | 0.235       | 10.179      | 0.017 |
| U-500    | 7.906         | 75.658      | 9.672        | 8.112       | 11.936      | 0.009 |
| U-5000   | 130.972       | 643.717     | 7.896        | 6.829       | 9.479       | 0.01  |
| C-50     | 0.77          | 8.989       | 4.639        | 1.182       | 15.259      | 0.024 |
| C-500    | 7.903         | 60.362      | 9.223        | 7.537       | 11.981      | 0.009 |
| C-5000   | 126.556       | 611.67      | 7.655        | 7.229       | 7.876       | 0.003 |
| E-50     | 0.777         | 9.227       | 4.878        | 0.587       | 11.05       | 0.019 |
| E-500    | 7.915         | 57.486      | 9.82         | 7.829       | 12.352      | 0.01  |
| E-5000   | 127.763       | 372.908     | 8.472        | 7.441       | 9.643       | 0.01  |
| I-50     | 0.779         | 9.81        | 4.782        | 0.707       | 13.409      | 0.021 |
| I-500    | 7.941         | 69.15       | 9.336        | 7.609       | 11.371      | 0.009 |
| I-5000   | 127.558       | 630.358     | 7.353        | 6.908       | 7.836       | 0.004 |

Table 22: Detailed results of INVIT-VRP-100 [PUPO] on random dataset.

| Instance | Mean Time (s) | Mean Length | Mean Gap (%) | Min Gap (%) | Max Gap (%) | Std   |
|----------|---------------|-------------|--------------|-------------|-------------|-------|
| U-50     | 0.776         | 10.365      | 5.055        | 0.369       | 9.866       | 0.017 |
| U-500    | 7.796         | 74.755      | 8.366        | 7.137       | 10.577      | 0.008 |
| U-5000   | 127.661       | 625.141     | 4.723        | 4.172       | 5.306       | 0.005 |
| C-50     | 0.775         | 9.017       | 4.973        | 0.651       | 17.35       | 0.026 |
| C-500    | 7.754         | 59.417      | 7.511        | 5.883       | 9.331       | 0.007 |
| C-5000   | 127.345       | 593.798     | 4.511        | 4.173       | 4.826       | 0.003 |
| E-50     | 0.783         | 9.27        | 5.365        | 0.804       | 12.195      | 0.021 |
| E-500    | 7.903         | 56.784      | 8.517        | 7.271       | 12.073      | 0.01  |
| E-5000   | 127.504       | 361.641     | 5.165        | 4.653       | 5.629       | 0.004 |
| I-50     | 0.793         | 9.856       | 5.283        | 0.473       | 13.671      | 0.021 |
| I-500    | 7.891         | 68.487      | 8.276        | 6.14        | 10.157      | 0.008 |
| I-5000   | 126.872       | 614.135     | 4.584        | 4.223       | 4.953       | 0.003 |
